# Supplementary material for: Multiplex recreation of human intestinal morphogenesis on a multi-well insert platform by basolateral convective flow
Source: Royal Society of Chemistry journal article supplement (doi:10.1039/d1lc00404b), 2021-01-01
Supplement: d1lc00404b1.pdf [file d1lc00404b1.pdf]

## Supplementary Information

### **Multiplex recreation of human intestinal morphogenesis on multi-well inserts platform by basolateral convective flow<sup>†</sup>**

Hyeon Beom Chong<sup>‡a</sup>, Jaeseung Youn<sup>‡a</sup>, Woojung Shin<sup>de</sup>, Hyun Jung Kim<sup>\*d</sup>, and Dong Sung Kim<sup>\*abc</sup>

*<sup>a</sup>Department of Mechanical Engineering, Pohang University of Science and Technology (POSTECH), 77 Cheongam-ro, Nam-gu, Pohang, Gyeongbuk, 37673, South Korea*

*<sup>b</sup>Department of Chemical Engineering, Pohang University of Science and Technology (POSTECH), 77, Cheongam-ro, Nam-gu, Pohang, Gyeongbuk 37673, Republic of Korea*

*<sup>c</sup>Institute for Convergence Research and Education in Advanced Technology, Yonsei University, 50, Yonsei-ro, Seodaemun-gu, Seoul 03722, Republic of Korea*

*<sup>d</sup>Department of Biomedical Engineering, The University of Texas at Austin, Austin, TX 78712, USA*

*<sup>e</sup>Present address: Wyss Institute for Biologically Inspired Engineering at Harvard University, Boston, MA 02115, USA*

<sup>†</sup>Electronic Supplementary Information (ESI) available. See DOI: 10.1039/x0xx00000x

<sup>‡</sup>These authors contributed equally to this work.

\*Co-correspondence to:

Dong Sung Kim, PhD

*Department of Mechanical Engineering, Pohang University of Science and Technology (POSTECH), 77 Cheongam-ro, Nam-gu, Pohang, Gyeongbuk, 37673, South Korea*

Email: smkds@postech.ac.kr

or

Hyun Jung Kim, PhD

*Department of Biomedical Engineering, The University of Texas at Austin, 107 W. Dean  
Keeton St., Austin, TX 78712, USA*

Email: [hyunjung.kim@utexas.edu](mailto:hyunjung.kim@utexas.edu)

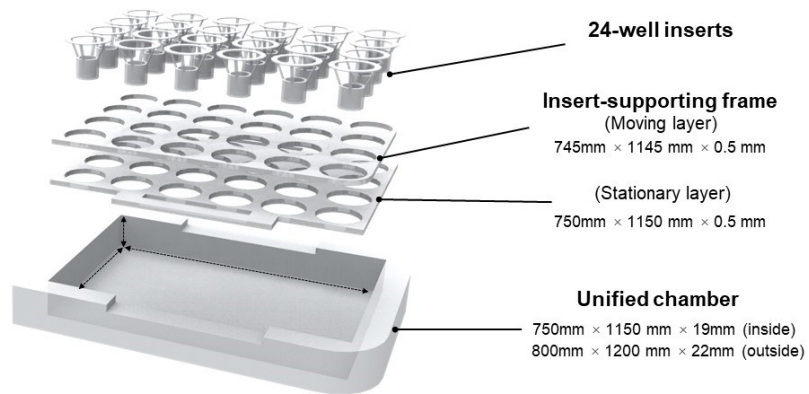

**Fig. S1** Dimension details of BASIN.

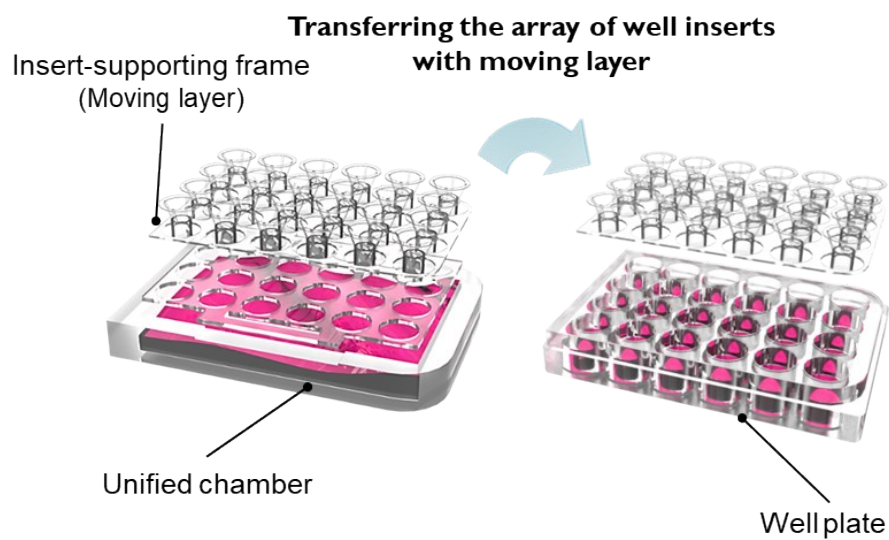

**Fig. S2** The moving layer of the insert-supporting frame allowed the easy transferring of well inserts from the unified chamber of BASIN to the conventional well plate.



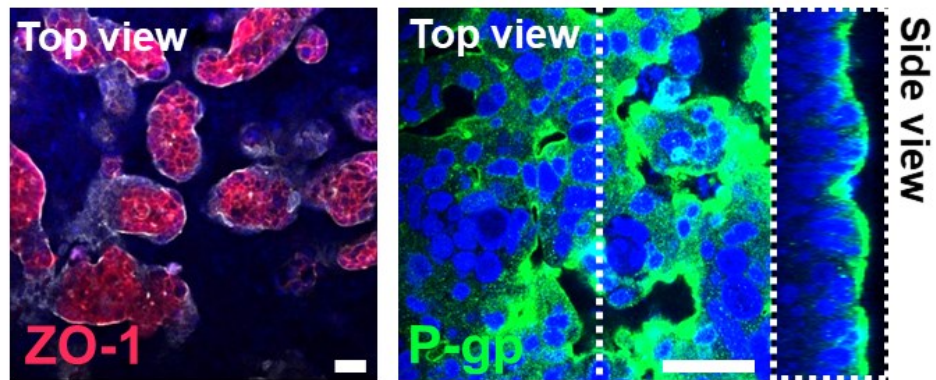

**Fig. S3** Immunofluorescence images of Caco-2 intestinal epithelium in BASIN stained with ZO-1 (red) and P-gp (green). (Scale bar: 50  $\mu$ m)

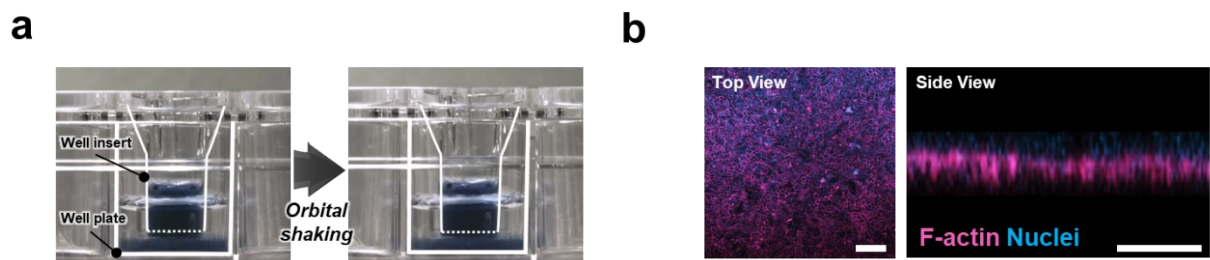

**Fig. S4** (a) Dye dispersion test on the 24-well plate of conventional Transwell system with orbital shaking. (b) Immunofluorescence images of Caco-2 intestinal epithelium cultured on orbitally shaken 24-well plate. The cells were stained with F-actin (magenta) and nuclei (cyan) (Scale bar: 50  $\mu$ m).

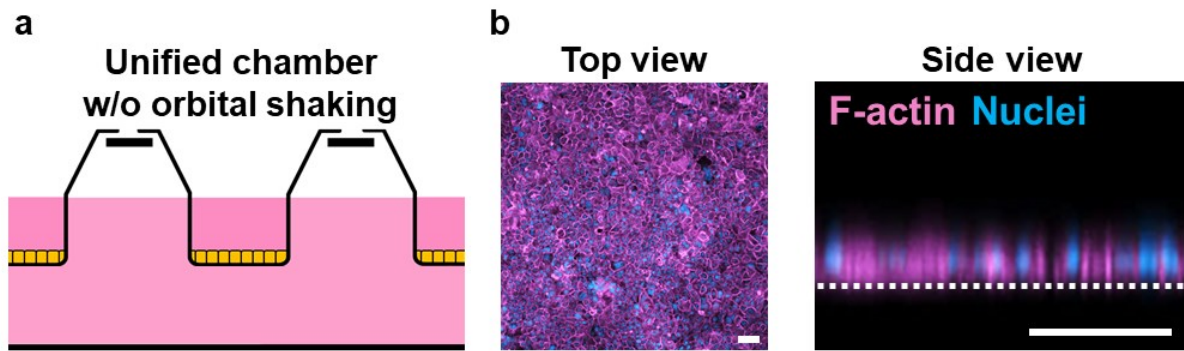

**Fig. S5** (a) Schematic illustration of the static culture condition of Caco-2 cells in the unified chamber without orbital shaking. (b) Immunofluorescence images of Caco-2 intestinal epithelium cultured in the unified chamber without orbital shaking stained with DAPI (blue) and Phalloidin (Magenta). (Scale bar: 50  $\mu$ m).

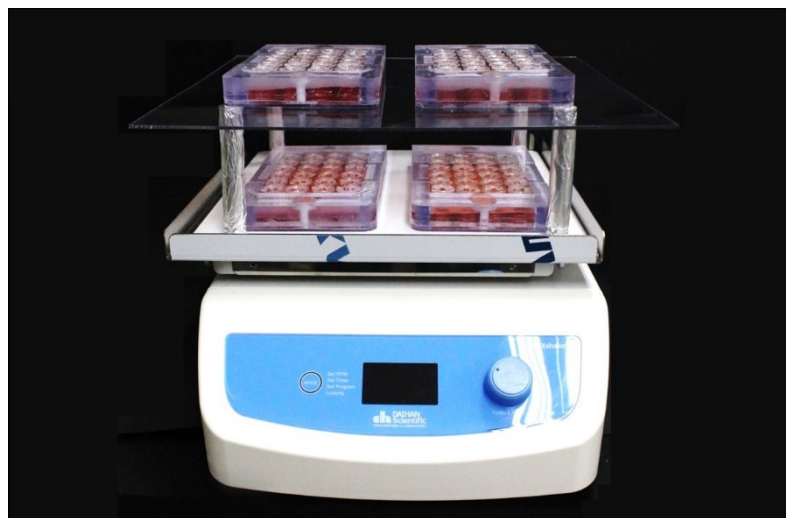

**Fig. S6** Stackable design of BASIN allowing the scale-up of the platform.

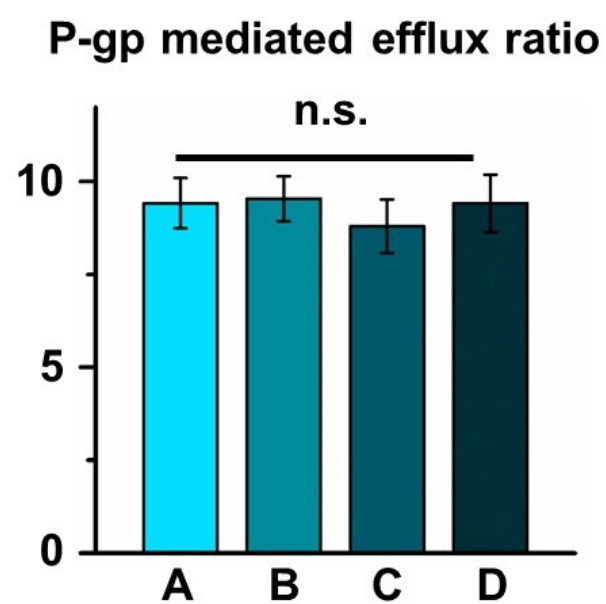

**Fig. S7** P-gp mediated efflux ratio of Caco-2 intestinal epithelium cultured on BASIN calculated by dividing  $P_{app\_b}$  with  $P_{app\_a}$  of Rhodamine 123.
